# Supplementary material for: Shared Decision Making With Young People at Ultra High Risk of Psychotic Disorder
Source: PubMed Central journal article supplement (PMC8481955; doi:10.3389/fpsyt.2021.683775), 2021-09-16
Supplement: Image_1.pdf [file Image_1.pdf]

## Supplementary Materials 1: Example screen shot from decision aid

# MY PACE

HOME INFORMATION MY BUCKET **AM I AT RISK?** MY OPTIONS MY DECISION GIVE US FEEDBACK

<< My Bucket Treatment Options >>

## Am I at risk?

We can't tell you if you will develop a psychotic disorder or not. We also can't tell you your exact chances of developing a psychotic disorder. What we can tell you is (on average) how many people who meet the at-risk criteria but do not get specialised help will go on to experience their first psychotic episode within a year. The good news is that the majority of people who meet the at-risk criteria will not experience a psychotic episode within a year. But the risk of this happening is much higher than in the general population. This is where there is more good news - there are treatment options that you can choose from [here](#).

### Am I at risk?

The chance of experiencing a psychotic episode

| General population                                                                                                                                                                                                                                                                                                                                                                                                                | At-risk criteria                                                                                                                                                                                                                                                                                                                                                                                                                          |
|-----------------------------------------------------------------------------------------------------------------------------------------------------------------------------------------------------------------------------------------------------------------------------------------------------------------------------------------------------------------------------------------------------------------------------------|-------------------------------------------------------------------------------------------------------------------------------------------------------------------------------------------------------------------------------------------------------------------------------------------------------------------------------------------------------------------------------------------------------------------------------------------|
| 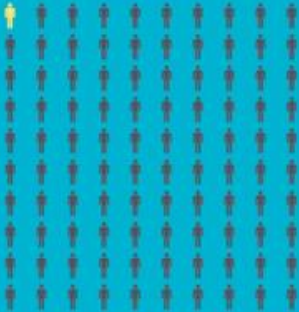 <p>In the next 12 months, <b>less than one person out of every 100</b> young people (or less than 1%) in the general population will experience a psychotic episode for the first time.</p> <p>This means that more than <b>99 out of 100</b> young people (or more than 99%) will not experience a psychotic episode for the first time.</p> |  <p>In the next 12 months, <b>22 out of every 100</b> young people (or 22%) who meet the at-risk criteria will experience a psychotic episode for the first time.</p> <p>This means that more than <b>78 out of 100</b> young people (or more than 99%) who meet the at-risk criteria will not experience a psychotic episode for the first time.</p> |
