# Supplementary material for: Shared Decision Making With Young People at Ultra High Risk of Psychotic Disorder
Source: PubMed Central journal article supplement (PMC8481955; doi:10.3389/fpsyt.2021.683775), 2021-09-16
Supplement: Image_3.pdf [file Image_3.pdf]

## Supplementary Materials 3: Example Focus Group probes

### *General discussion items*

1. What are the key decisions faced by PACE Clients?
2. What are the relevant treatment options available to PACE Clients?
3. For each treatment option:
  - a. What are the potential benefits of doing this option?
  - b. What are the potential risks or harms of doing this option?
  - c. What information do people need to know about this option?
  - d. What can be difficult about making a decision about whether or not to do this option?
  - e. What personal preferences and values (of clients) have you seen impact decision making for this option?

### *Decision aid specific discussion items*

1. Home page
  - a. What do you think of the *content* of this page? What would you definitely keep? What would you definitely change?
  - b. What do you think of the *layout and design* of this page? Can you comment on whether or not it is user friendly? What other functions would be useful here?
2. Risk of transition page
  - a. What do you think of the *content* of this page? What would you definitely keep? What would you definitely change?
  - b. What do you think of the *layout and design* of this page? Can you comment on whether or not it is user friendly? What other functions would be useful here?
  - c. Can you talk about the positive or negative aspects of the graphs?
3. Treatment options page
  - a. What do you think of the *content* of this page? What would you definitely keep? What would you definitely change?
  - b. What do you think of the *layout and design* of this page? Can you comment on whether or not it is user friendly? What other functions would be useful here?
  - c. Can you talk about the positive or negative aspects of the graphs?
4. What matters to you page
  - a. What do you think of the *content* of this page? What would you definitely keep? What would you definitely change?
  - b. What do you think of the *layout and design* of this page? Can you comment on whether or not it is user friendly? What other functions would be useful here?
5. Information page
  - a. What do you think of the *content* of this page? What would you definitely keep? What would you definitely change?
  - b. What do you think of the *layout and design* of this page? Can you comment on whether or not it is user friendly? What other functions would be useful here?
